# Supplementary material
Source: PubMed Central journal article supplement (PMC6346124)
Supplement: 7bbfc81f8c955b687e5803adcedb9a56_IAI.00570-18-s0001.pdf [file 7bbfc81f8c955b687e5803adcedb9a56_IAI.00570-18-s0001.pdf]

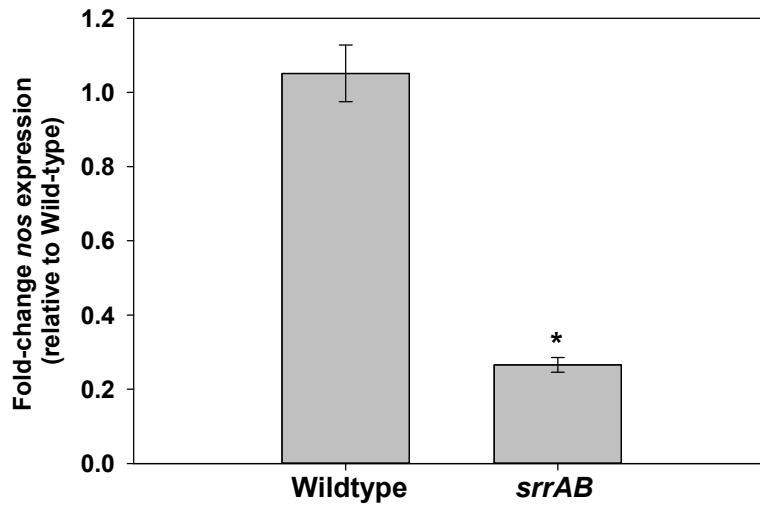

**Figure S1:** Real-time PCR of *nos* expression in wildtype and *srrAB* mutant low-oxygen cultures. Wild-type and *srrAB* mutant low-oxygen TSB+G cultures were grown for 6 hours, and RNA was extracted from cell pellets. Expression of *nos* was measured in cDNA synthesized from each RNA sample by real-time PCR. Relative fold expression was calculated using the Livak method ( $2^{-\Delta\Delta Ct}$ ) and normalized to the reference housekeeping gene *sigA*. Data represent the average from n=3 biological samples, error bars = SEM. \*P<0.001 Mann-Whitney Rank Sum Test.

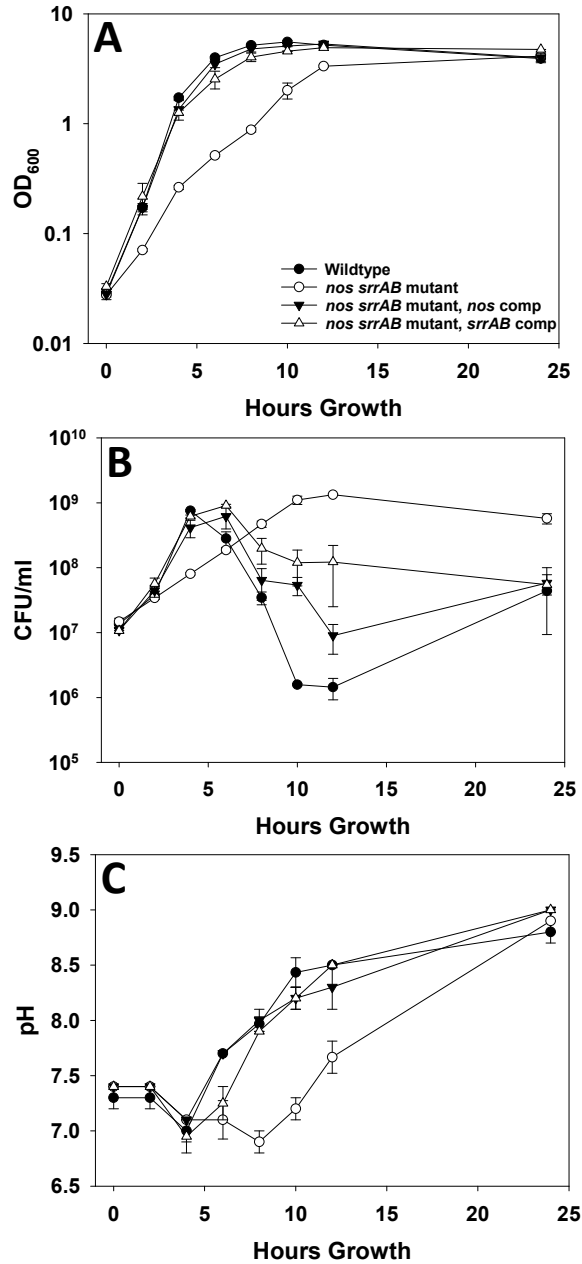

**Figure S2:** Growth analysis of UAMS-1 (wildtype), *nos srrAB* mutant, and *nos srrAB* complement strains. Aerobic TSB-G cultures were inoculated to an  $OD_{600} = 0.025$  in TSB-G media and grown at 37°C with aeration (250 RPM; 1:12.5 volume to flask ratio). Growth over a 24-hour period was monitored by tracking  $OD_{600}$  measurements (A), CFU/ml by serial dilution plating (B), and pH measurement (C). Data points represent the average of 3 independent experiments and error bars = SEM.

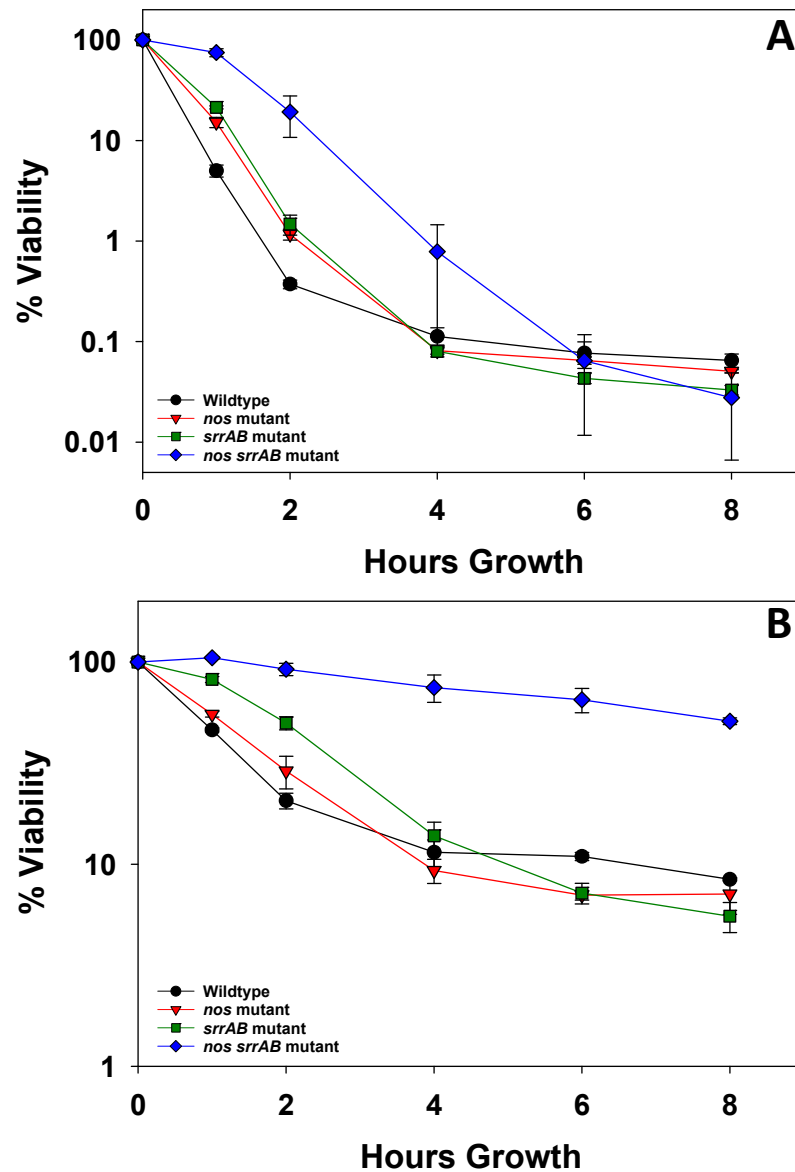

**Figure S3:** Contributions of saNOS and SrrAB to antibiotic killing. Early-exponential phase aerobic TSB-G cultures of UAMS-1 (wildtype) and isogenic *nos*, *srrAB*, and *nos srrAB* mutants were treated with final concentrations of either 30  $\mu\text{g/ml}$  ciprofloxacin (A) or 40  $\mu\text{g/ml}$  vancomycin (B), and CFU/ml were monitored at t=0 (just prior to antibiotic treatment), 1, 2, 4, 6, 8 hours post-treatment, as described in Materials and Methods. All data represent the average of n=3 independent experiments, error bars = SEM.

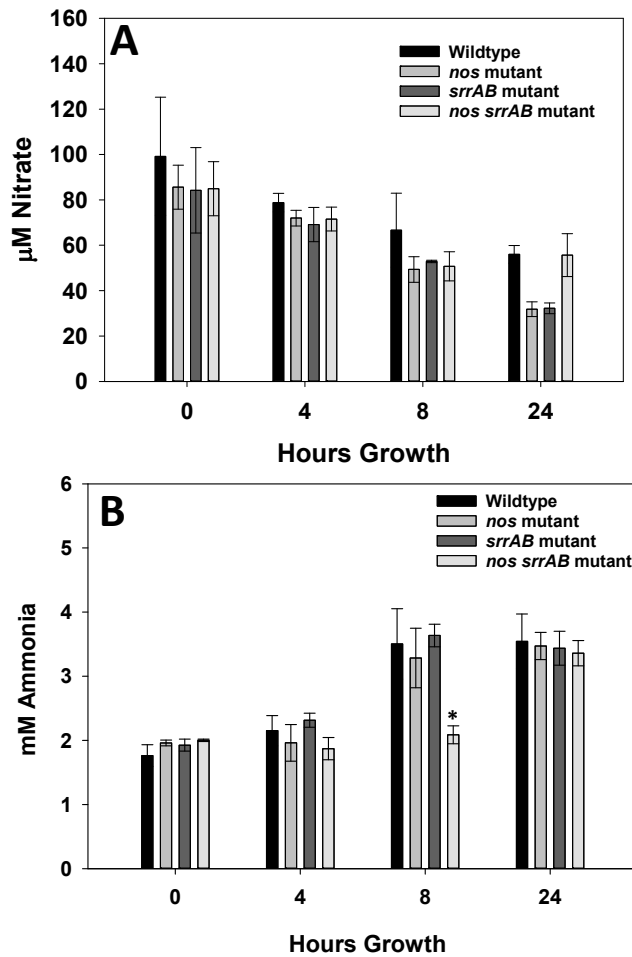

**Figure S4:** Nitrate and ammonia concentrations in supernatants. Extracellular nitrate and ammonia was measured from supernatants of wild-type, *nos* mutant, *srrAB* mutant, and *nos srrAB* mutant aerobic growth curves in TSB-G media. A. Nitrate measurements B. Ammonia measurements. For both A and B: Samples were collected at T = 0, 4, 8, 24 hours after inoculation. Measurements were performed using R-Biopharm kits in 96-well cell culture plates and each supernatant had an n=3 technical replicates and for each condition N=3 biological replicates, error bars = SEM). \*P = 0.03 T-test (relative to wildtype).

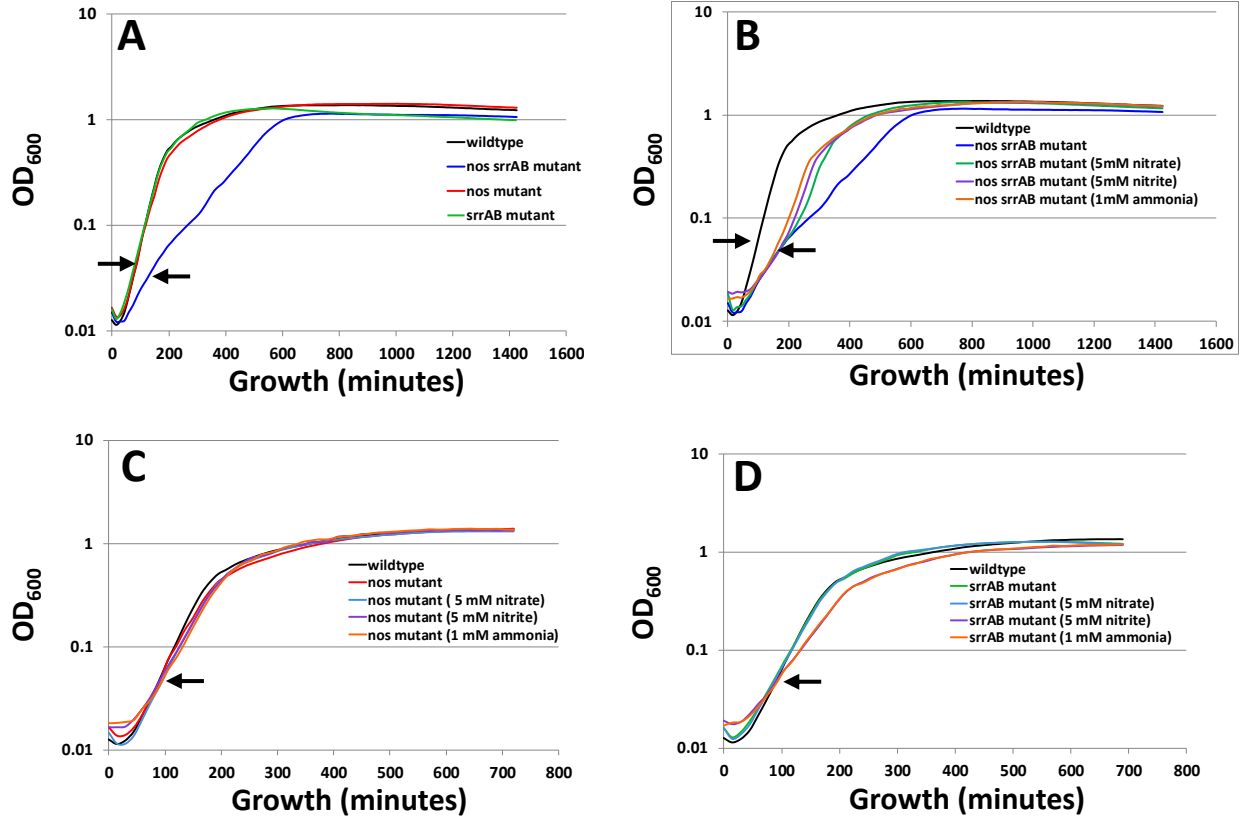

**Figure S5:** Bioscreen growth curves. Wildtype, *nos* mutant, *srrAB* mutant, and *nos srrAB* mutant were inoculated to a final  $OD_{600} = 0.025$  in TSB-G and were grown untreated or supplemented with either 5 mM nitrate, 1 mM nitrite, or 1 mM ammonia. 200  $\mu$ l aliquots were dispensed into quadruplicate wells of a Bioscreen C plate. Cultures were incubated in a Bioscreen C plate reader with maximum shaking at 37°C and growth was monitored by measuring the  $OD_{600}$  every 15 minutes for 24 hours. Graphs are representative of  $n=3$  biological replicates. Black arrows represent the linear region of the graph in which maximum specific growth rates were calculated for Figure 6.

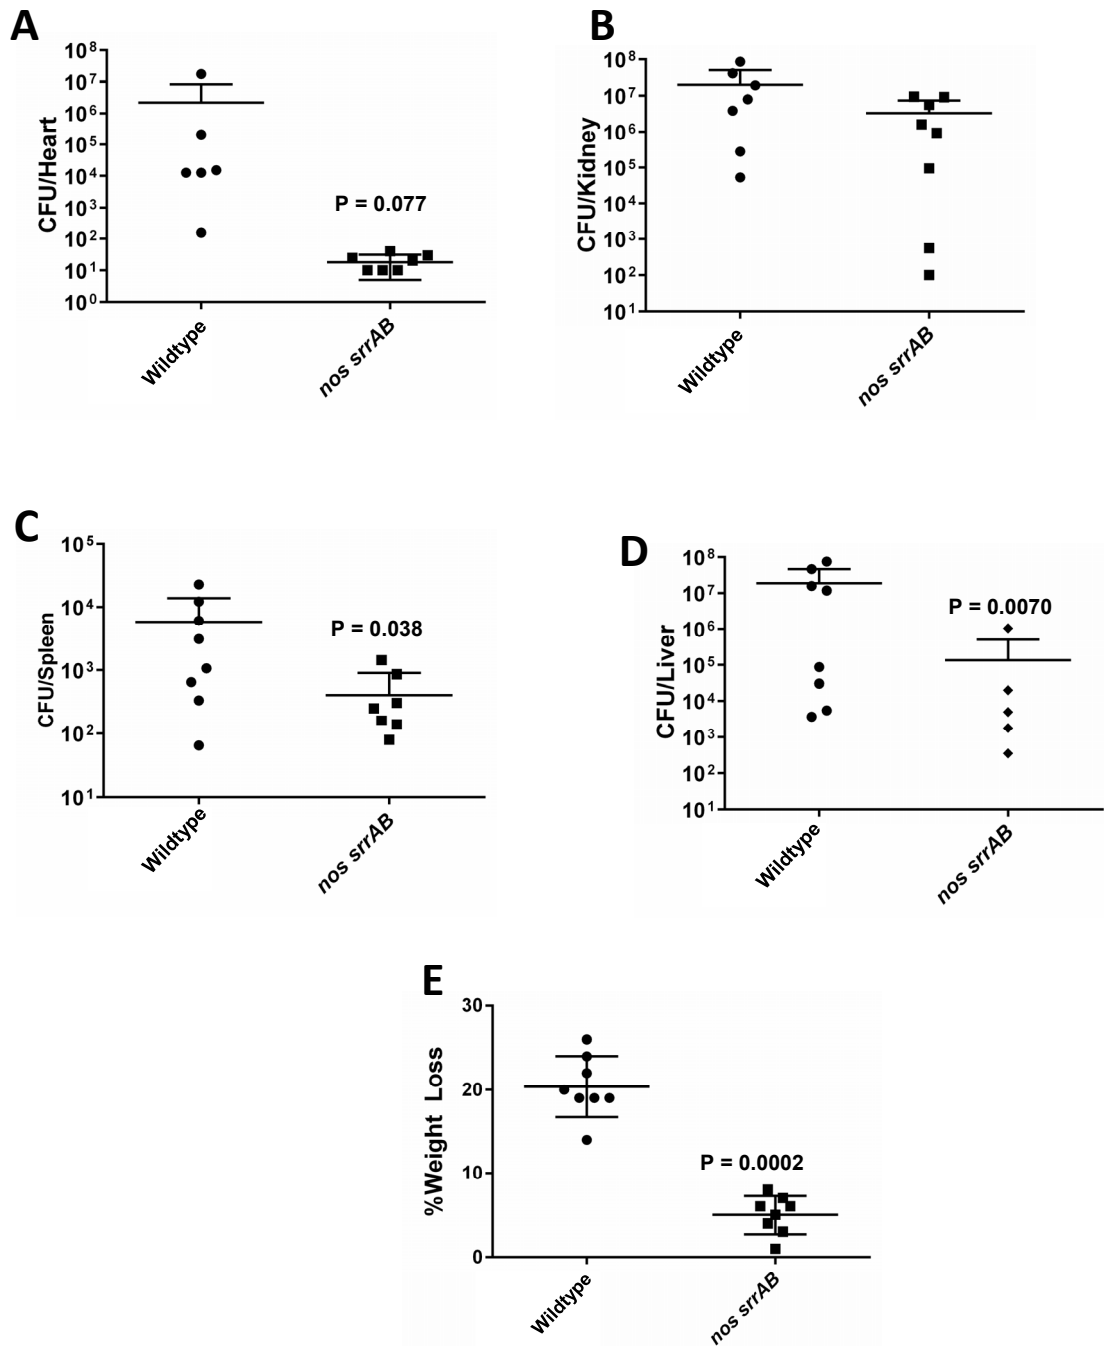

**Figure S6:** 4-day sepsis infection. UAMS-1 (wildtype;  $3.95 \times 10^7$  CFU) and isogenic *nos srrAB* ( $3.9 \times 10^7$  CFU) mutant cultures were each retro-orbitally injected into 8-week-old C57BL/6 female mice (n=8 mice per group). Mice were euthanized 4-days post-infection, and organs were processed for CFU/organ determination as described in Materials and Methods. Graphs depict the calculated bacterial burdens for heart (A), kidney (B), spleen (C) and liver (D). The percent weight loss at 4-days post infection of each animal group is also reported (E). For A–E, data are graphed as scatter plots with mean (solid line) and standard deviation (error bars). Two-tailed P-values are reported for all significantly different comparisons to wild-type using a Mann-Whitney Test.

**Table S1. List of bacterial strains and plasmids used in this study**

| <b>Strain or plasmid name</b> | <b>Description</b>                                                                    | <b>Reference or source</b> |
|-------------------------------|---------------------------------------------------------------------------------------|----------------------------|
| <i>E. coli</i> DH5 $\alpha$   | Host strain for construction of recombinant plasmids                                  | (1)                        |
| <i>Staphylococcus aureus</i>  |                                                                                       |                            |
| RN4220                        | Easily transformable restriction deficient strain                                     | (2)                        |
| UAMS-1                        | Osteomyelitis clinical isolate                                                        | (3)                        |
| KR1010                        | UAMS-1 <i>nos::erm</i> insertion mutant                                               | (4)                        |
| KB6004                        | UAMS-1 $\Delta$ <i>srrAB</i> deletion mutant                                          | (5)                        |
| KR1014                        | UAMS-1 <i>nos::erm</i> $\Delta$ <i>srrAB</i> mutant                                   | This study                 |
| pTR27                         | <i>nos::erm</i> allele-replacement plasmid in pBT2; Erm <sup>R</sup> /Cm <sup>R</sup> | (4)                        |
| pBT2                          | Temperature-sensitive shuttle vector; Cm <sup>R</sup> /Amp <sup>R</sup>               | (6)                        |
| pMK <i>nos</i>                | <i>nos</i> complementation plasmid; Cm <sup>R</sup>                                   | (4)                        |
| pMK4                          | Shuttle vector; Cm <sup>R</sup> /Amp <sup>R</sup>                                     | (7)                        |
| pIHW58                        | <i>srrAB</i> complementation plasmid in pJB94; Tet <sup>R</sup>                       | (8)                        |

---

**Table S2. PCR primers used in this study**

| Primer                     | Purpose          | Sequence (5'-3')                                        | Reference or Source |
|----------------------------|------------------|---------------------------------------------------------|---------------------|
| sigA-F<br>sigA-R           | Real-time<br>PCR | F - CAAGCAATCACTCGTGCAAT<br>R - GGTGCTGGATCTCGACCTAA    | (4)                 |
| sar0233<br>( <i>hmp</i> )  | Real-time<br>PCR | F - AGAGGCATGCAATCTTCAGC<br>R - AGTGCGCAGTGTTTATATGC    | (9)                 |
| sar0256<br>( <i>scdA</i> ) | Real-time<br>PCR | F - TGCGGCGGACAAGTAAGTAT<br>R - GCGAACCTGGTGTATTCGTT    | (9)                 |
| sar0218<br>( <i>pfIB</i> ) | Real-time<br>PCR | F - GCTGTAAAGCAGCCTACCG<br>R - AGAAGCATATGCCCTTCAC      | (9)                 |
| sar1032<br>( <i>qoxC</i> ) | Real-time<br>PCR | F - ACGCATGGTTGTCACGTATC<br>R - TGTCTAATCCGCGTCGTTG     | (9)                 |
| sar2680<br>( <i>ldh2</i> ) | Real-time<br>PCR | F - CTTGCAGTTTGGTCACAAGC<br>R - TTCCGCTTTAGCTTCGCTAC    | (9)                 |
| sar0234<br>( <i>ldh1</i> ) | Real-time<br>PCR | F - GGTGTTGCAATGGGATTAGC<br>R - TGTGCGAACTTGCTTTGTTC    | This Paper          |
| sar2486<br>( <i>narG</i> ) | Real-time<br>PCR | F - CGGCAAGAGCAGTTATTTTCG<br>R - GACCCAGGCGTTTGAATATG   | (9)                 |
| sar2489<br>( <i>nirB</i> ) | Real-time<br>PCR | F - TGCAGAACATAACGGCAAAG<br>R - TCCCTTGATCCGTTTCGTTT    | This Paper          |
| sar2493<br>( <i>narT</i> ) | Real-time<br>PCR | F - TATGGGGACGACTGGGTAAA<br>R - GCGGTAAATCTGGTTCGTGT    | This Paper          |
| sar2714<br>( <i>arcA</i> ) | Real-time<br>PCR | F - AGCACGACGACGAGAATCAA<br>R - AAACAAGTTCATCGCCGCCT    | This Paper          |
| sar2713<br>( <i>arcB</i> ) | Real-time<br>PCR | F - TGGTGTACCGGTGTGGAATG<br>R - ACGTCCATCTCCAACGTAAG    | This Paper          |
| sar0184<br>( <i>argJ</i> ) | Real-time<br>PCR | F - GGTGCGTTTAAACGAGGCAAT<br>R - TCCTTTAGCACTGCCACCAA   | This Paper          |
| sar0923<br>( <i>argG</i> ) | Real-time<br>PCR | F - GCATTGCGACCTGTACGTGA<br>R - TCATTGCTCTGCCCATAG      | This Paper          |
| sar1142<br>( <i>otc</i> )  | Real-time<br>PCR | F - AGGTGCTGCCATTATGGGTA<br>R - GTTGCCACCATTTTCAGCGG    | This Paper          |
| sar2255<br>( <i>rocF</i> ) | Real-time<br>PCR | F - CGCCAGGCACAGGTACTIONA<br>R - CCGATTGTTTCAGCAGTATGGT | This Paper          |
| sar2007<br>( <i>nos</i> )  | Real-time<br>PCR | F - TATGGTGCTAAAATGGCTTG<br>R - ACGATGCTTCGTCAGTAACA    | (4)                 |



## Supplemental References:

1. Hanahan D. 1983. Studies on transformation of *Escherichia coli* with plasmids. J Mol Biol 166:557-80.
2. Kreiswirth BN, Lofdahl S, Betley MJ, O'Reilly M, Schlievert PM, Bergdoll MS, Novick RP. 1983. The toxic shock syndrome exotoxin structural gene is not detectably transmitted by a prophage. Nature 305:709-12.
3. Gillaspay AF, Lee CY, Sau S, Cheung AL, Smeltzer MS. 1998. Factors affecting the collagen binding capacity of *Staphylococcus aureus*. Infect Immun 66:3170-8.
4. Sapp AM, Mogen AB, Almand EA, Rivera FE, Shaw LN, Richardson AR, Rice KC. 2014. Contribution of the *nos-pdt* operon to virulence phenotypes in methicillin-sensitive *Staphylococcus aureus*. PLoS One 9:e108868. doi: 10.1371/journal.pone.0108868. eCollection 2014.
5. Lewis AM, Matzdorf SS, Endres JL, Windham IH, Bayles KW, Rice KC. 2015. Examination of the *Staphylococcus aureus* nitric oxide reductase (saNOR) reveals its contribution to modulating intracellular NO levels and cellular respiration. Mol Microbiol 96:651-69. doi: 10.1111/mmi.12962. Epub 2015 Mar 16.
6. Bruckner R. 1997. Gene replacement in *Staphylococcus carnosus* and *Staphylococcus xylosus*. FEMS Microbiol Lett 151:1-8.
7. Sullivan MA, Yasbin RE, Young FE. 1984. New shuttle vectors for *Bacillus subtilis* and *Escherichia coli* which allow rapid detection of inserted fragments. Gene 29:21-6.
8. Windham IH, Chaudhari SS, Bose JL, Thomas VC, Bayles KW. 2016. SrrAB Modulates *Staphylococcus aureus* Cell Death through Regulation of *cidABC* Transcription. J Bacteriol 198:1114-22. doi: 10.1128/JB.00954-15.
9. Mogen AB, Carroll RK, James KL, Lima G, Silva D, Culver JA, Petucci C, Shaw LN, Rice KC. 2017. *Staphylococcus aureus* nitric oxide synthase (saNOS) modulates aerobic respiratory metabolism and cell physiology. Mol Microbiol 105:139-157. doi: 10.1111/mmi.13693. Epub 2017 May 10.
